# Supplementary material for: Circadian Misalignment Induced by Chronic Night Shift Work Promotes Endoplasmic Reticulum Stress Activation Impacting Directly on Human Metabolism
Source: PubMed Central journal article supplement (PMC7998626; doi:10.3390/biology10030197), 2021-03-05
Supplement: biology-10-00197-s001.pdf [file biology-10-00197-s001.pdf]

Supplementary Files:

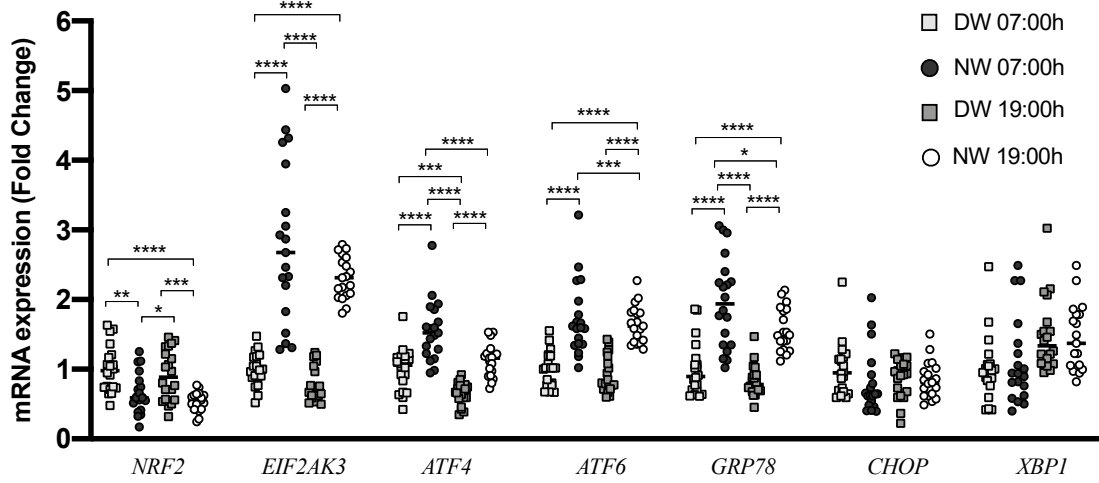

**Supplementary Figure S1.** Determination of the expression of genes related to endoplasmic reticulum stress in P.B.M.C. samples of day and night workers at 0700h and 1900h normalized by DW at 07:00h. Gene expression was evaluated by RT-qPCR. Data are presented as dot plot with mean. Unpaired, one-tailed t-test. \* $P < 0.05$ ; \*\* $P < 0.01$ ; \*\*\* $P = 0.001$ ; \*\*\*\* $P < 0.001$ .

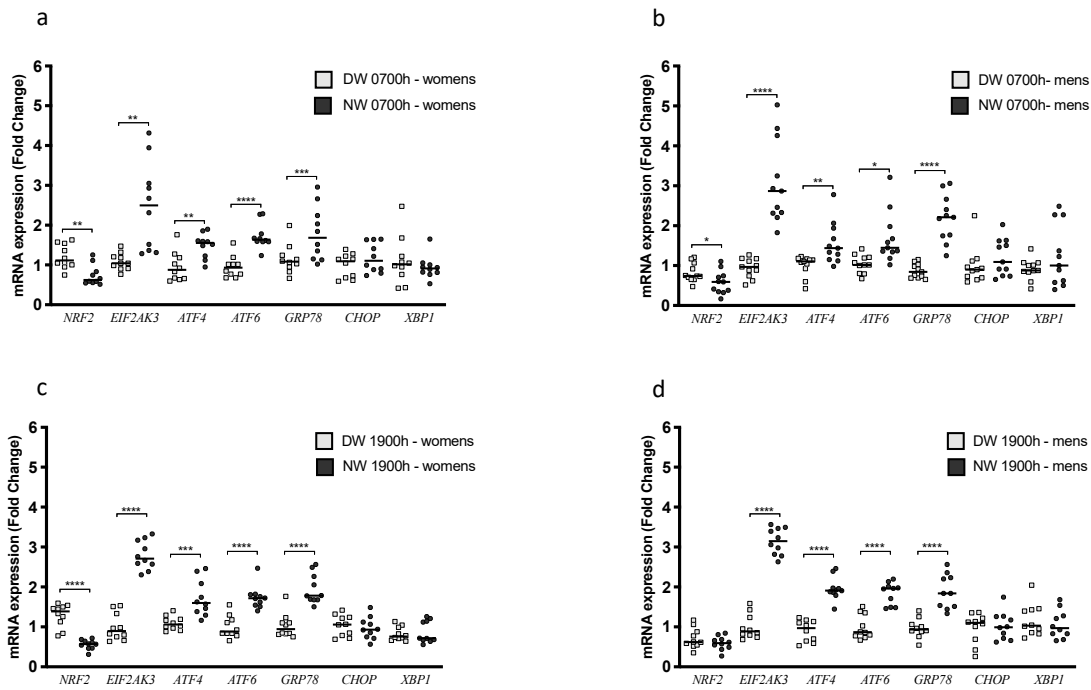

**Supplementary Figure S2.** Gene expression related of Endoplasmic Reticulum Stress genes in PBMC samples of day and night workers collected at 0700h and 1900h. A. Gene expression of women (n= 10) collected at 0700h. B. Gene expression of men (n=10) collected at 0700h. C. Gene expression of women (n= 10) collected at 1900h. D. Gene expression of men (n= 10) collected at 1900h. Gene expression was evaluated by RT-qPCR. Data are presented as dot plot with mean. Unpaired, one-tailed t-test. \* $P < 0.05$ ; \*\* $P < 0.01$ ; \*\*\* $P = 0.001$ ; \*\*\*\* $P < 0.001$ .

**Supplementary Table S1.** Sequences of the oligonucleotides. Oligonucleotides used for the analysis of expression in PBMC samples.

| <i>Gene</i>    | <i>Forward</i>           | <i>Reverse</i>           |
|----------------|--------------------------|--------------------------|
| <i>CLOCK</i>   | TGCGAGGAACAATAGACCCAA    | ATGGCCTATGTGTGCGTTGTA    |
| <i>BMAL</i>    | TGCAACGCAATGTCCAGGAA     | GGTGGCACCTCTTAATGTTTTCA  |
| <i>CRY1</i>    | TTGGAAAGGAACGAGACGCAG    | CGGTTGTCCACCATTGAGTT     |
| <i>PER1</i>    | GCCAACCAGGAATACTACCAGC   | GTGTGTACTCAGACGTGATGTG   |
| <i>NRF2</i>    | TTCCCGGTACATCGAGAG       | TCCTGTTGCATACCGTCTAAATC  |
| <i>EIF2AK3</i> | TGTCGCCAATGGGATAGTGACGAA | AATCCGGCTCTCGTTTCCATGTCT |
| <i>ATF4</i>    | GGGTTCTCCAGCGACAAGGCTAAG | AACAGGGCATCCAAGTCGAACTC  |
| <i>ATF6</i>    | ATGTCTCCCCTTTTCTTATATGGT | AAGGCTTGGGCTGAATTGAA     |
| <i>GRP78</i>   | CATCACGCCGTCTATGTCG      | CGTCAAAGACCGTGTCTCG      |
| <i>CHOP</i>    | GGAGAACCAGGAAACGGAAAC    | TTCCTTCATGCGCTGCTTT      |
| <i>XBP1</i>    | TGGCCGGGTCTGCTGAGTCCG    | ATCCATGGGAAGATGTTCTGG    |
| <i>GAPDH</i>   | AGGGCTGCTTTTAACTCTGGT    | CCCCTTGATTTTGGAGGGA      |
| <i>18S</i>     | GGCCCTGTAATTGGAATGAGTC   | CCAAGATCCAACACTACGAGCTT  |

**Supplementary Table S2 -** Correlation between body weight and blood metabolites.

|                     | <b>Weight vs. Glucose</b> | <b>Weight vs. Hb1ac</b> | <b>Weight vs. Cholesterol</b> | <b>Weight vs. Triglycerides</b>    | <b>Weight vs. HDL</b> | <b>Weight vs. LDL</b> | <b>Weight vs. CRP</b> |
|---------------------|---------------------------|-------------------------|-------------------------------|------------------------------------|-----------------------|-----------------------|-----------------------|
| <b>Day worker</b>   | r=0,1106<br>p=0,642       | r=0,1881<br>p=0,427     | r=0,1055<br>p= 0.658          | r=0,3357<br>p=0,147                | r=-0,05999<br>p=0,801 | r=0,1328<br>p=0,576   | r=-0,0385<br>p=0,872  |
| <b>Night worker</b> | r=0,2709<br>p=0,248       | r=-0,2765<br>p=0,238    | r=0,0836<br>p=0,725           | <b>r=-0,5135</b><br><b>p=0,020</b> | r=0,2064<br>p=0,382   | r=-0,0036<br>p=0,987  | r=0,0764<br>p=0,748   |

Supplementary table S3. - Correlation between ERS genes and CLOCK genes at 0700h and 1900h.

|                         | 0700h                |                                   | 1900h                   |                      |
|-------------------------|----------------------|-----------------------------------|-------------------------|----------------------|
|                         | <i>Day worker</i>    | <i>Night worker</i>               | <i>Day worker</i>       | <i>Night worker</i>  |
| <b>NRF2 vs CLOCK</b>    | r=0,1531<br>p=0,742  | r=0,4256<br>p=0,345               | <b>NRF2 vs CLOCK</b>    | r=0,5012<br>p=0,128  |
| <b>EIF2AK3 vs CLOCK</b> | r=0,2301<br>p=0,329  | <b>r=0,6639</b><br><b>p=0,002</b> | <b>EIF2AK3 vs CLOCK</b> | r=0,2065<br>p=0,594  |
| <b>ATF4 vs CLOCK</b>    | r=0,1950<br>p=0,410  | <b>r=0,5877</b><br><b>p=0,008</b> | <b>ATF4 vs CLOCK</b>    | r=0,3796<br>p=0,321  |
| <b>ATF6 vs CLOCK</b>    | r=0,1513<br>p=0,546  | r=0,2654<br>p=0,601               | <b>ATF6 vs CLOCK</b>    | r=0,4352<br>p=0,241  |
| <b>GRP78 vs CLOCK</b>   | r=-0,1290<br>p=0,610 | r=-0,1765<br>p=0,427              | <b>GRP78 vs CLOCK</b>   | r=-0,3768<br>p=0,317 |
| <b>CHOP vs CLOCK</b>    | r=-0,0353<br>p=0,889 | r=-0,1274<br>p=0,603              | <b>CHOP vs CLOCK</b>    | r=-0,2683<br>p=0,485 |
| <b>XBP1 vs CLOCK</b>    | r=0,2415<br>p=0,450  | r=0,359<br>p=0,323                | <b>XBP1 vs CLOCK</b>    | r=0,3621<br>p=0,323  |
| <b>NRF2 vs BMAL1</b>    | r=0,2798<br>p=0,232  | r=0,2805<br>p=0,244               | <b>NRF2 vs BMAL1</b>    | r=0,4447<br>p=0,230  |
| <b>EIF2AK3 vs BMAL1</b> | r=0,3068<br>p=0,2014 | r=0,2439<br>p=0,314               | <b>EIF2AK3 vs BMAL1</b> | r=0,2781<br>p=0,468  |
| <b>ATF4 vs BMAL1</b>    | r=0,2604<br>p=0,2674 | r=0,3826<br>p=0,105               | <b>ATF4 vs BMAL1</b>    | r=0,2577<br>p=0,503  |
| <b>ATF6 vs BMAL1</b>    | r=-0,0309<br>p=0,900 | r=-0,3804<br>p=0,107              | <b>ATF6 vs BMAL1</b>    | r=-0,0382<br>p=0,930 |
| <b>GRP78 vs BMAL1</b>   | r=-0,2332<br>p=0,351 | r=-0,3562<br>p=0,299              | <b>GRP78 vs BMAL1</b>   | r=-0,5557<br>p=0,120 |
| <b>CHOP vs BMAL1</b>    | r=-0,0523<br>p=0,831 | r=-0,1150<br>p=0,6293             | <b>CHOP vs BMAL1</b>    | r=-0,1273<br>p=0,744 |
| <b>XBP1 vs BMAL1</b>    | r=-0,0146<br>p=0,952 | r=-0,3543<br>p=0,136              | <b>XBP1 vs BMAL1</b>    | r=-0,0265<br>p=0,945 |
| <b>NRF2 vs CRY1</b>     | r=0,2795<br>p=0,232  | r=0,3659<br>p=0,102               | <b>NRF2 vs CRY1</b>     | r=0,1812<br>p=0,572  |
| <b>EIF2AK3 vs CRY1</b>  | r=0,3068<br>p=0,2014 | r=0,1361<br>p=0,578               | <b>EIF2AK3 vs CRY1</b>  | r=0,1180<br>p=0,714  |
| <b>ATF4 vs CRY1</b>     | r=0,2604<br>p=0,267  | r=0,2523<br>p=0,254               | <b>ATF4 vs CRY1</b>     | r=0,0433<br>p=0,893  |
| <b>ATF6 vs CRY1</b>     | r=0,0309<br>p=0,900  | r=0,1506<br>p=0,538               | <b>ATF6 vs CRY1</b>     | r=0,0818<br>p=0,800  |
| <b>GRP78 vs CRY1</b>    | r=-0,2805<br>p=0,244 | r=0,4424<br>p=0,057               | <b>GRP78 vs CRY1</b>    | r=-0,2621<br>p=0,235 |
| <b>CHOP vs CRY1</b>     | r=-0,2439<br>p=0,314 | r=0,4377<br>p=0,060               | <b>CHOP vs CRY1</b>     | r=-0,2917<br>p=0,352 |
| <b>XBP1 vs CRY1</b>     | r=0,402<br>p=0,204   | r=0,2012<br>p=0,408               | <b>XBP1 vs CRY1</b>     | r=0,4758<br>p=0,195  |
| <b>NRF2 vs PER1</b>     | r=0,3598<br>p=0,130  | r=0,1142<br>p=0,641               | <b>NRF2 vs PER1</b>     | r=0,4781<br>p=0,192  |
| <b>EIF2AK3 vs PER1</b>  | r=0,2239<br>p=0,356  | r=0,1587<br>p=0,503               | <b>EIF2AK3 vs PER1</b>  | r=0,4607<br>p=0,218  |
| <b>ATF4 vs PER1</b>     | r=0,3770<br>p=0,101  | r=0,2411<br>p=0,320               | <b>ATF4 vs PER1</b>     | r=0,3400<br>p=0,247  |
| <b>ATF6 vs PER1</b>     | r=0,0628<br>p=0,798  | r=0,1887<br>p=0,439               | <b>ATF6 vs PER1</b>     | r=0,3831<br>p=0,308  |
| <b>GRP78 vs PER1</b>    | r=0,4117<br>p=0,071  | r=0,091<br>p=0,708                | <b>GRP78 vs PER1</b>    | r=0,4523<br>p=0,221  |
| <b>CHOP vs PER1</b>     | r=0,0233<br>p=0,924  | r=0,0869<br>p=0,723               | <b>CHOP vs PER1</b>     | r=0,3049<br>p=0,425  |
| <b>XBP1 vs PER1</b>     | r=0,2629<br>p=0,262  | r=0,1643<br>p=0,501               | <b>XBP1 vs PER1</b>     | r=0,2317<br>p=0,548  |
